# Supplementary material
Source: HighWire-hosted journal article supplement (https://thorax.bmj.com/highwire/filestream/210113/field_highwire_adjunct_files/0/thorax-2023-221148supp001_data_supplement.pdf)
Supplement: thorax-2023-221148supp001_data_supplement.pdf [file thorax-2023-221148supp001_data_supplement.pdf]

**SUPPLEMENT FILE 1****REMAP-ILD Consortium  
(alphabetical order)**

Amanda Bravery, Imperial College Clinical Trials Unit, Imperial College London, London, **United Kingdom**

Amanda Goodwin, University of Nottingham, Nottingham, **United Kingdom**

Ana Etges, Federal University of Rio Grande do Sul, Farroupilha, Porto Alegre, **Brazil**

Ana Boshoff, Imperial College Clinical Trials Unit, Imperial College London, London, **United Kingdom**

Andreas Günther, Justus-Liebig-University of Giessen, Goethestrasse 58, Giessen, **Germany**

Andrew Briggs, London School of Hygiene and Tropical Medicine, London, **United Kingdom**

Andrew Palmer, Menzies Research Institute, University of Tasmania, **Australia**

Andrew Wilson, University of East Anglia, Norwich, **United Kingdom**

Anjali Crawshaw, Department of Respiratory Medicine, University Hospitals Birmingham NHS Foundation Trust, Birmingham, **United Kingdom**

Anna-Maria Hoffmann-Vold, 1. Department of Rheumatology, Oslo University Hospital, **Norway**  
2. Department of Rheumatology, University Hospital Zurich, University of Zurich, **Switzerland**

Anne Bergeron, University Hospitals Geneva, Geneva, **Switzerland**

Anne Holland, Monash University, Melbourne, **Australia**

Anthony C. Gordon, Division of Anaesthetics, Pain Medicine and Intensive Care, Imperial College London, London, **United Kingdom**

Antje Prasse, Hannover Medical School, Hannover, **Germany**

Argyris Tzouvelekis, Department of Respiratory Medicine, University of Patras, **Greece**

Athina Trachalaki, Imperial College London, South Kensington, London, **United Kingdom**

Athol Wells, Royal Brompton Hospital, London, **United Kingdom**

Avinash Anil Nair, Christian Medical College, Vellore, **India**

Ayodeji Adegunsoye, University of Chicago, Chicago, Illinois, **USA**

Barbara Wendelberger, Berry Consultants, LLC, Austin, Texas, **USA**

Ben Hope-Gill, Cardiff and Vale University Hospital, Wales, **United Kingdom**

Bhavika Kaul, 1. U.S. Department of Veterans Affairs Center for Innovation in Quality, Effectiveness, and Safety 2. Baylor College of Medicine and University of California San Francisco, California, **USA**

Bibek Gooptu, University of Leicester, University Road, Leicester, **United Kingdom**

Bruno Guedes Baldi, Pulmonary Division, Heart Institute (InCor), University of Sao Paulo Medical School, Sao Paulo, **Brazil**

Bruno Crestani, Hôpital Bichat, Assistance Publique Hôpitaux de Paris, Paris, **France**

Carisi Anne Polanczyk, Federal University of Rio Grande do Sul, Sao Paulo, **Brazil**

Carlo Vancheri, University – Hospital Policlinico “G. Rodolico – San Marco” University of Catania, Catania, **Italy**

Carlos Crobai, European Respiratory Society, Sheffield, **United Kingdom**

Charlotte Summers, University of Cambridge, Cambridge, **United Kingdom**

Chris Grainge, John Hunter Hospital, Newcastle, Australia and University of Newcastle, Newcastle, **Australia**

Chris J. Ryerson, Centre for Heart Lung Innovation, University of British Columbia and St. Paul's Hospital, Vancouver, **Canada**

Christophe von Garnier, Centre Hospitalier Universitaire Vaudois, Lausanne, **Switzerland**

Christopher Huntley, University Hospitals Birmingham, Birmingham, **United Kingdom**

Claudia Ravaglia, University of Bologna, Bologna, **Spain**

Claudia Valenzuela, Hospital Universitario de La Princesa, Madrid, **Spain**

Conal Hayton, Manchester University Hospital, Manchester, **United Kingdom**

Cormac McCarthy, University College Dublin, Belfield, Dublin, **Ireland**

Daniel Chambers, Queensland Health, Brisbane, **Australia**

Daphne Babalis, Imperial College Clinical Trials Unit, Imperial College London, London, **United Kingdom**

David Thickett, University of Birmingham, Birmingham, **United Kingdom**

David Turner, University of East Anglia, Norwich, **United Kingdom**

Deepak Talwar, Metro Respiratory Centre Pulmonology & Sleep Medicine, Noida, Uttar Pradesh, **India**

Devaraj Anand, Royal Brompton Hospital, London, **United Kingdom**

Devesh Dhasmana, University of St. Andrews, St. Andrews, Scotland, **United Kingdom**

Dhruv Parek, Brimingham University, Birmingham, **United Kingdom**

Diane Griffiths, University Hospitals Birmingham, Birmingham, **United Kingdom**

Diego Castillo Villegas, Hospital de la Santa Creu I Sant Pau. Barcelona, **Spain**

Duncan Richards, Nuffield Department of Orthopaedics, Rheumatology and Musculoskeletal Sciences, University of Oxford, **United Kingdom**

Eliana Santucci, Hcor Research Institute, Hcor Hospital, Sao Paulo, **Brazil**

Elisabeth Bendstrup, Aarhus University, Aarhus C, **Denmark**

Elisabetta Balestro, University of Padua, Padova PD, **Italy**

Eliza Tsitoura, University of Crete, Heraklion, **Greece**

Emanuela Falaschetti, Imperial College Clinical Trials Unit, Imperial College London, London, **United Kingdom**

Ena Gupta, University of Vermont Health Network, Burlington, Vermont, **USA**

Erica Farrand, University of California, San Fransisco, **USA**

Fasihul Khan, University of Nottingham, Nottingham, **United Kingdom**

Fernando J. Martinez, Weill Cornell Medicine/NY Presbyterian Hospital, New York, **USA**

Francesco Bonella, Essen University Hospital, Essen, **Germany**

Francesco Lombardi, Division of Pulmonary Medicine, Fondazione Policlinico Universitario Agostino Gemelli IRCCS, Rome, **Italy**

Gary M. Hunninghake, Brigham and Women's Hospital, Harvard Medical School, Massachusetts, **USA**

Gauri Saini, Nottingham University Hospital, Nottingham, **United Kingdom**

Gisli Jenkins, Margaret Turner Warwick Centre for Fibrosing Lung Disease, National Heart and Lung Institute, Imperial College London, **United Kingdom**

Gunnar Gudmundsson, University of Iceland, Reykjavik, **Iceland**

Harold Collard, University of California San Francisco, California, **USA**

Helen Parfrey, Royal Papworth Hospital NHS Foundation Trust, Cambridge, **United Kingdom**

Helmut Prosch, Dept. of Biomedical Imaging and Image-guided Therapy, Medical University of Vienna, Vienna, **Austria**

Hernan Fainberg, Imperial College London, London, **United Kingdom**

Huzaifa Adamali, North Bristol NHS Trust, Bristol, **United Kingdom**

Iain Stewart, National Heart and Lung Institute, Imperial College London, London, **United Kingdom**

Ian Forrest, Newcastle Hospitals NHS Foundation Trust, Newcastle, **United Kingdom**

Ian Glaspole, Alfred Hospital, Melbourne, **Australia**

Iazmin Bauer-Ventura, University of Chicago, Chicago, Illinois, **USA**

Imre Noth, University of Virginia, Charlottesville, Vermont, **USA**

Ingrid Cox, Menzies Institute for Medical Research, University of Tasmania, **Australia**

Irina Strambu, Institutul de Pneumoftiziologie "Marius Nasta", Bucharest, **Romania**

Jacobo Sellares, Grup de Treball de Malalties Pulmonars Intersticials, Pneumology Service, Hospital Clinic. Barcelona, **Spain**

James Eaden, Sheffield Teaching Hospitals NHS FT, Sheffield, **United Kingdom**

Janet Johnston, Manchester Royal Infirmary NHS Foundation Trust, Manchester, **United Kingdom**

Jeff Swigris, National Jewish Health, Denver, Colorado, **USA**

John Blaikley, Manchester University, Manchester, **United Kingdom**

John S Kim, University of Virginia, Charlottesville, Vermont, **USA**

Jonathan Chung, University of Chicago, Illinois, **USA**

Joseph A Lasky, Tulane & Pulmonary Fibrosis Foundation, Louisiana, **USA**

Joseph Jacob, Centre for Medical Image Computing, University College London; UCL Respiratory, University College London, **United Kingdom**

Joyce Lee, University of Colorado, Colorado, **USA**

Juergen Behr, LMU University Hospital, LMU Munich, **Germany**

Karin Storrer, Federal University of Parana, Curitiba, **Brazil**

Katarzyna Lewandowska, Institute of Tuberculosis and Lung Diseases, Warsaw, **Poland**

Kate Johnson, The University of British Columbia, Vancouver, **Canada**

Katerina Antoniou, Department of Respiratory Medicine, School of Medicine, University of Crete, **Greece**

Katrin Hostettler, University Hospital Basel, Basel, **Switzerland**

Kerri A. Johansson, Department of Medicine, University of Calgary, Alberta, **Canada**

Killian Hurley, Royal College of Surgeons in Ireland, Dublin, **Ireland**

Kirsty Hett, Cardiff and Vale University Health Board, Wales, **United Kingdom**

Larissa Schwarzkopf, The Institute for Therapy Research, Munich, **Germany**

Laura Fabbri, Margaret Turner Warwick Centre for Fibrosing Lung Diseases, NHLI, Imperial College, London, UK; Interstitial Lung Disease Unit, Royal Brompton and Harefield Clinical Group, Guy's and St Thomas' NHS Foundation Trust, London, **United Kingdom**

Laura Price, Royal Brompton Hospital, London, **United Kingdom**

Laurence Pearmain, Manchester University, Manchester, **United Kingdom**

Leticia Kawano-Dourado, Hcor Research Institute, Hospital do Coracao, Sao Paulo, **Brazil**. 2. Pulmonary Division, Heart Institute (InCor), University of Sao Paulo Medical School, Sao Paulo, Brazil. 3. MAGIC Evidence Ecosystem Foundation, Oslo, **Norway**

Liam Galvin, European Pulmonary Fibrosis Federation, Brussels, **Belgium**

Lisa G. Spencer, Liverpool Interstitial Lung Disease Service, Aintree Hospital, Liverpool University Hospitals NHS Foundation Trust, Liverpool, **United Kingdom**

Lisa Watson, Sheffield Teaching Hospitals NHS FT, Sheffield, **United Kingdom**

Louise Crowley, Queen Elizabeth Hospital, University Hospitals Birmingham, Birmingham, **United Kingdom**

Luca Richeldi, Agostino Gemelli IRCCS University Hospital Foundation, Rome, **Italy**

Lucilla Piccari, Department of Pulmonary Medicine, Hospital del Mar, Barcelona, **Spain**

Manuela Funke-Chambour, Department of Pulmonary Medicine, Inselspital, Bern University Hospital, University of Bern, **Switzerland**

Maria Molina-Molina, Interstitial Lung Disease Unit, Respiratory Department, University Hospital of Bellvitge, IDIBELL, Barcelona, **Spain**

Mark Jones, Southampton University, Southampton, **United Kingdom**

Mark Spears, University of Dundee, Scotland, **United Kingdom**

Mark Toshner, University of Cambridge, Cambridge, **United Kingdom**

Marlies Wijsenbeek-Lourens, Erasmus University Medical Hospital, Rotterdam, **Netherlands**

Martin Brutsche, Kantonsspital St.Gallen, Sankt Gallen, **Switzerland**

Martina Vasakova, Thomayer University Hospital, Prague, **Czech Republic**

Melanie Quintana, Berry Consultants, LLC, Austin, Texas, **USA**

Michael Gibbons, University of Exeter, Exeter, **United Kingdom**

Michael Henry, Cork University Hospital, Cork, **Ireland**

Michael P. Keane, University College Dublin, **Ireland**

Michael Kreuter, Mainz Centre for Pulmonary Medicine, Departments of Pneumology, Mainz University Medical Centre and of Pulmonary, Critical Care & Sleep Medicine, Marienhaus Clinic Mainz, Mainz, **Germany**

Milena Man, Iuliu Hațieganu University of Medicine and Pharmacy, Cluj-Napoca, **Romania**

Mohsen Sadatsafavi, The University of British Colombia, Vancouver, **Canada**

Naftali Kaminski, Pulmonary, Critical Care and Sleep Medicine, Yale School of Medicine, Connecticut, **USA**

Nazia Chaudhuri, Department of health and life sciences, School of medicine, University of Ulster, **United Kingdom**

Nick Weatherley, Sheffield University Hospitals, Sheffield, **United Kingdom**

Nik Hirani, The University of Edinburgh, Scotland, **United Kingdom**

Ovidiu Fira Mladinescu, Victor Babeş University of Medicine and Pharmacy, Timisoara, **Romania**

Paolo Spagnolo, University of Padua, Padova, **Italy**

Paul Beirne, Leeds Teaching Hospitals NHS Foundation Trust, Leeds, **United Kingdom**

Peter Bryce, The Pulmonary Fibrosis Trust, Lichfield, **United Kingdom**

Peter George, Royal Brompton Hospital, London, **United Kingdom**

Philip L Molyneaux, Imperial College London, London, **United Kingdom**

Pilar Rivera-Ortega, Interstitial Lung Disease Unit, Department of Respiratory Medicine, Wythenshawe Hospital. Manchester University NHS Foundation Trust. Manchester, **United Kingdom**

Radu Crisan-Dabija, University of Medicine and Pharmacy "Grigore T. Popa" Iasi, **Romania**

Rahul Maida, University of Birmingham, Birmingham, **United Kingdom**

Raphael Borie, Hôpital Bichat, Assistance Publique Hôpitaux de Paris, Paris, **France**

Reoto Takei, Department of Respiratory Medicine and Allergy, Tosei General Hospital, Seto, **Japan**

Roger Lewis, 1. Berry Consultants, LLC, Austin, Texas, USA; 2. Department of Emergency Medicine, Harbor-UCLA Medical Center, Los Angeles, **USA**

Rui Rolo, Braga Hospital, Braga, **Portugal**

Sabina Guler, University Hospital of Bern, Bern, **Switzerland**

Sabrina Paganoni, Massachusetts General Hospital, Boston, **USA**

Sally Singh, University of Leicester, Leicester, **United Kingdom**

Sara Freitas, University Hospital Coimbra, Coimbra, **Portugal**

Sara Piciucchi, Department of Radiology, GB Morgagni Hospital, Azienda USL Romagna, **Italy**

Shama Malik, Action for Pulmonary Fibrosis, London, **United Kingdom**

Shaney Barratt, North Bristol NHS Trust, Bristol, **United Kingdom**

Simon Hart, University of Hull, Hull, **United Kingdom**

Simone Dal Corso, Respiratory Research@Alfred, Central Clinical School, Monash University, Melbourne, Victoria, **Australia**

Sophie V. Fletcher, University Hospital Southampton NHS Foundation Trust, NIHR Southampton Respiratory Biomedical Research Centre; University of Southampton, School of Clinical and Experimental Sciences, Faculty of Medicine, Southampton, **United Kingdom**

Stefan Stanel, Manchester University NHS Foundation Trust, Manchester, **United Kingdom**

Stephen Bianchi, Sheffield Teaching Hospitals NHS Foundation Trust, Sheffield, **United Kingdom**

Steven Jones, Action for Pulmonary Fibrosis, London, **United Kingdom**

Steven Nathan, Inova Medical Group, Virginia, **USA**

Sujeet Rajan, Bombay Hospital Institute of Medical Sciences and Bhatia Hospital, Mumbai, India

Surinder Birring, King's College London, London, **United Kingdom**

Sydney B. Montesi, Division of Pulmonary and Critical Care Medicine, Massachusetts General Hospital, Massachusetts, **USA**

Takei Reoto, Osaka Prefectural Medical Centre for Respiratory and Allergic Diseases, Osaka, **Japan**

Tamara J. Corte, University of New South Wales, Sydney, **Australia**

Tanzira Zaman, Cedars Sinai, California, **USA**

Tejaswini Kulkarni, Division of Pulmonary, Allergy and Critical Care Medicine, The University of Alabama, Birmingham, **USA**

Timothy Gatheral, University Hospitals of Morecambe Bay NHS Foundation Trust, Cumbria, **United Kingdom**

Tom Jensen, Berry Consultants, LLC, Texas, **USA**

Tom McMillan, Pulmonary Fibrosis NI, Ballycastle, **United Kingdom**

Valerie Quinn, Margaret Turner Warwick Centre for Fibrosing Lung Disease, National Heart and Lung Institute, Imperial College London, **United Kingdom**

Venerino Poletti, University of Bologna, Bologna, **Italy**

Victoria Cornelius, Imperial College Clinical Trials Unit, Imperial College London, London, **United Kingdom**

Vincent Cottin, Louis Pradel Hospital/Claude Bernard University, Lyon, **France**

Wendy Adams, Action for Pulmonary Fibrosis, London, **United Kingdom**

Wim Wuyts, Leuven University Hospital, Leuven, **Belgium**

Yasuhiro Kondoh, Department Respiratory Medicine and Allergy, Tosei General Hospital, Aichi, **Japan**

Yasunari Miyazaki, Department Respiratory Medicine and Allergy, Tokyo Medical and Dental University, Tokyo, **Japan**

Yet Hong Khor, Respiratory Research@Alfred, Central Clinical School, Monash University, Melbourne, Victoria, Australia; Department of Respiratory and Sleep Medicine, Austin Health, Heidelberg, Victoria, **Australia**

Yussef Haider, The London School of Hygiene and Tropical Medicine, London, **United Kingdom**
